# Supplementary material
Source: Springer Nature journal article supplement (https://www.springermedizin.de/resource/supplementary/12937_2012_626_MOESM6_ESM.pdf/25653806)

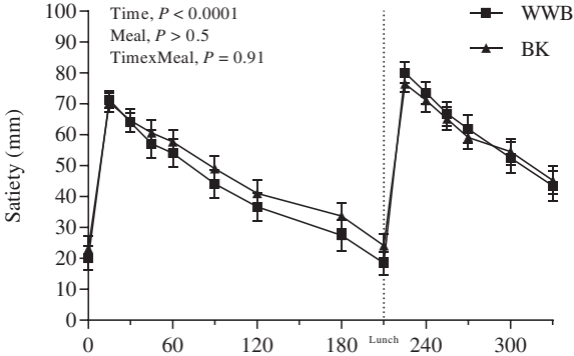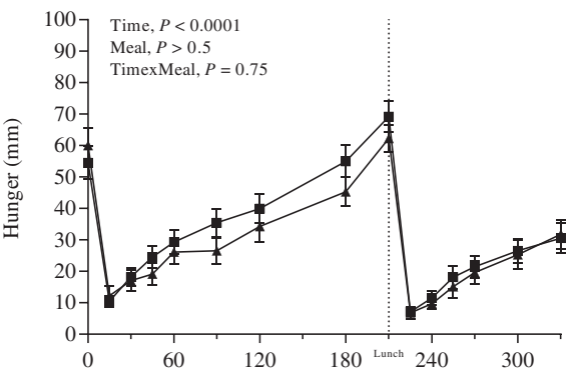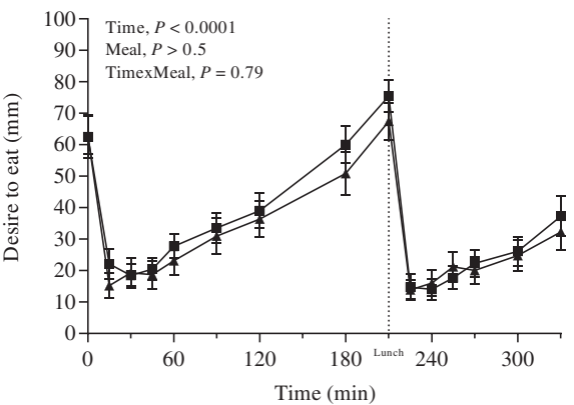

Supplement: MOESM6 [file 25653806]
